# Supplementary material
Source: Springer Nature journal article supplement (https://www.springermedizin.de/resource/supplementary/12935_2013_394_MOESM1_ESM.pdf/9540522)

Rd

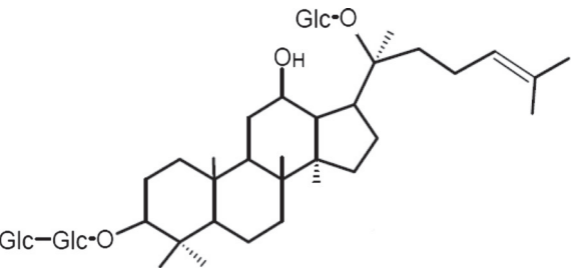

Rg3

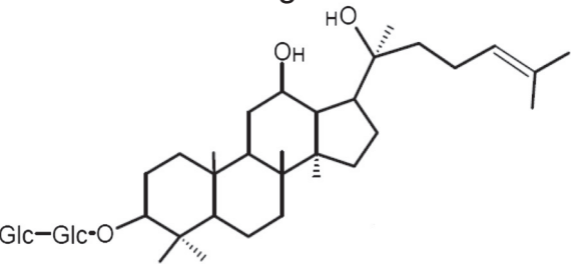

Compound K

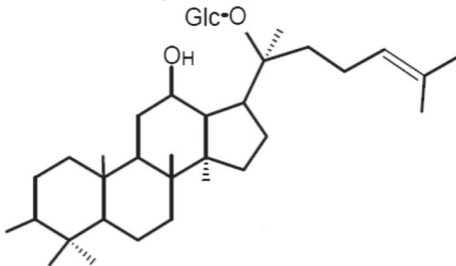

Supplement: MOESM1 [file 9540522]
